# Supplementary material
Source: PubMed Central journal article supplement (PMC2867852)
Supplement: 1000154107_pnas.201000154SI.pdf [file 1000154107_pnas.201000154SI.pdf]

# Supporting Information

Jin et al. 10.1073/pnas.1000154107

**Table S1. Arterial blood monitoring before and after MCAO**

| Genotype | Treatment | Pre- or post-MCAO | pH          | PaCO <sub>2</sub> (mm Hg) | HCO <sub>3</sub> <sup>-</sup> (mmol/L) | Glucose (mg/dL) |
|----------|-----------|-------------------|-------------|---------------------------|----------------------------------------|-----------------|
| WT       | PBS       | Pre               | 7.25 ± 0.03 | 43.4 ± 1.4                | 28.4 ± 0.9                             | 211 ± 9         |
|          |           | Post              | 7.30 ± 0.00 | 42.8 ± 2.9                | 27.1 ± 0.9                             | 206 ± 5         |
|          | GCV       | Pre               | 7.30 ± 0.00 | 44.2 ± 3.0                | 27.5 ± 1.6                             | 194 ± 8         |
|          |           | Post              | 7.30 ± 0.00 | 42.7 ± 2.9                | 27.1 ± 0.8                             | 193 ± 10        |
| Dcx-TK   | PBS       | Pre               | 7.30 ± 0.00 | 44.3 ± 3.0                | 26.2 ± 1.0                             | 200 ± 2         |
|          |           | Post              | 7.26 ± 0.05 | 42.8 ± 2.2                | 27.1 ± 0.8                             | 199 ± 8         |
|          | GCV       | Pre               | 7.30 ± 0.00 | 42.7 ± 2.3                | 27.5 ± 0.9                             | 205 ± 13        |
|          |           | Post              | 7.35 ± 0.05 | 43.0 ± 2.4                | 27.3 ± 1.5                             | 206 ± 6         |

Values are mean ± SD (*n* = 3–4). PaCO<sub>2</sub>, partial pressure of arterial blood CO<sub>2</sub>.
